# Supplementary material for: Snake C-Type Lectins Potentially Contribute to the Prey Immobilization in Protobothrops mucrosquamatus and Trimeresurus stejnegeri Venoms
Source: PubMed Central journal article supplement (PMC7076790; doi:10.3390/toxins12020105), 2020-02-06
Supplement: toxins-12-00105-s001.pdf [file toxins-12-00105-s001.pdf]

# Snake C-Type Lectins Potentially Contribute to the Prey Immobilization in *Protobothrops mucrosquamatus* and *Trimeresurus stejnegeri* Venoms

Huiwen Tian, Ming Liu, Jiameng Li, Runjia Xu, Chengbo Long, Hao Li, James Mwangi, Qiumin Lu, Chuanbin Shen and Ren Lai

## α Subunits

|                |      |              |          |    |             |              |         |       |       |       |       |       |      |      |       |
|----------------|------|--------------|----------|----|-------------|--------------|---------|-------|-------|-------|-------|-------|------|------|-------|
|                | 1    | 10           | 20       | 30 | 40          | 50           | 60      | 70    | 80    |       |       |       |      |      |       |
| Mucetin        | MGRF | FFVSFGLLVVFL | SLSGTGAD | FD | CFPGWSAYDRY | CYQAFSEPKNWD | DAESFC  | EEGV  | RTS   | HLVSI | SSG   | GD    | FVAQ | QLV  |       |
| Stejnulxin     | MGRF | FFVSFGLLVVFL | SLSGTGAD | FD | CFSGWSAYDWY | CYKPFNEPQ    | TWDDAER | FCTEQ | AKGG  | HLVSI | SSG   | AD    | FVG  | QLV  |       |
| Echicetin      | MGRF | FFVSFGLLVVFL | SLSGTGAD | FD | CFSGWSAYDWY | CYKPFNEPQ    | TWDDAER | FCTEQ | AKGG  | HLVSI | SSG   | AD    | FVG  | QLV  |       |
| Convulxin      | MGRF | FFVSFGLLVVFL | SLSGTGAD | FD | CFSDWYSDYD  | QHCYRIFNEP   | MNWD    | DAER  | FCTEQ | AKGA  | HLVSI | SSG   | AD   | FVAW |       |
| Agglucetin     | MGRF | FFVSFGLLVVFL | SLSGTGAD | FD | CFPGWSAYDQY | CYQVIFNEP    | KNWD    | DAER  | FCTEQ | ADGG  | HLVSI | SSG   | AD   | FVAQ |       |
| Jerdonuxin     | MGRF | FFVSFGLLVVFL | SLSGTGAD | FD | CFPGWSAYDRY | CYQAFSEPKNWD | DAESFC  | EEGV  | RTS   | HLVSI | SSG   | GD    | FVAQ | QLV  |       |
| Mamushigin     | MGRF | FFVSFGLLVVFL | SLSGTGAD | FD | CFSDWSSYEGH | CYRVFQKEM    | TWDAER  | FCTEQ | QRKES | HLVSI | SSG   | AD    | FV   | VSMT |       |
| Rhodocytin     | MGRF | FFVSFGLLVVFL | SLSGTGAD | FD | CFSGWSAYEGH | CYKPFNEP     | KNWD    | DAER  | FCTEQ | AKLP  | PHS   | HLVSI | SSG  | AD   | FVKLT |
| Alboaggregin-B | MGRF | FFVSFGLLVVFL | SLSGTGAD | FD | CFPGWSAYDRY | CYQAFSEPKNWD | DAESFC  | MEG   | VKS   | HLVSI | SSG   | AD    | FVAQ | QLV  |       |

  

|                |     |           |      |        |      |       |        |    |       |     |      |      |      |    |     |       |        |    |    |   |
|----------------|-----|-----------|------|--------|------|-------|--------|----|-------|-----|------|------|------|----|-----|-------|--------|----|----|---|
|                | 90  | 100       | 110  | 120    | 130  | 140   | 150    |    |       |     |      |      |      |    |     |       |        |    |    |   |
| Mucetin        | AEK | IKTSFQYVW | TGLR | IQNKEQ | CRSE | PSDAS | SVSYEN | LI | FKQSS | SKK | CYAT | KKGT | ELRT | WF | NVY | CGREN | PFVCKY | TF | EC |   |
| Stejnulxin     | SEN | IQRPEIYVW | TGLR | DRRKEQ | QCS  | SEWSD | GTSTI  | I  | YV    | N   | KN   | G    | ES   | Q  | CG  | L     | S      | K  | W  | T |
| Echicetin      | SEN | IQRPEIYVW | TGLR | DRRKEQ | QCS  | SEWSD | GTSTI  | I  | YV    | N   | KN   | G    | ES   | Q  | CG  | L     | S      | K  | W  | T |
| Convulxin      | TQN | IESFSHVW  | TGLR | VONKEQ | CS   | T     | K      | W  | S     | D   | S    | S    | V    | Y  | D   | L     | L      | D  | L  | Y |
| Agglucetin     | SON | IESVEDHVW | TGLR | VONKEQ | CS   | T     | K      | W  | S     | D   | S    | S    | V    | Y  | D   | L     | L      | D  | L  | Y |
| Jerdonuxin     | SEK | IKTSFQYVW | TGLR | IQNKEQ | CRSE | PSDAS | SVSYEN | LI | FKQSS | SKK | CYAT | KKGT | ELRT | WF | NVY | CGREN | PFVCKY | TF | EC |   |
| Mamushigin     | WF  | ILKYDFVWI | TGLR | IQNKEQ | CRSE | PSDAS | SVSYEN | LI | FKQSS | SKK | CYAT | KKGT | ELRT | WF | NVY | CGREN | PFVCKY | TF | EC |   |
| Rhodocytin     | RP  | RLKANLVW  | TGLR | IQNKEQ | CRSE | PSDAS | SVSYEN | LI | FKQSS | SKK | CYAT | KKGT | ELRT | WF | NVY | CGREN | PFVCKY | TF | EC |   |
| Alboaggregin-B | NEN | IKTSFRYVW | TGLR | IQNKEQ | CRSE | PSDAS | SVSYEN | LI | FKQSS | SKK | CYAT | KKGT | ELRT | WF | NVY | CGREN | PFVCKY | TF | EC |   |

## β Subunits

|                |      |              |            |    |           |      |        |      |     |    |    |      |    |    |    |    |    |    |    |
|----------------|------|--------------|------------|----|-----------|------|--------|------|-----|----|----|------|----|----|----|----|----|----|----|
|                | 1    | 10           | 20         | 30 | 40        | 50   | 60     | 70   |     |    |    |      |    |    |    |    |    |    |    |
| Mucetin        | MGRF | IFVSFGLLVVFL | SLSGTEAGFC | CP | LGWSSYDEH | CYQV | FQQKMN | WEDA | KFC | TQ | OH | TGSH | LV | SV | HS | SE | EV | DF | VV |
| Stejnulxin     | MGRF | IFVSFGLLVVFL | SLSGTEAGFC | CP | LGWSSYDEH | CYQV | FQQKMN | WEDA | KFC | TQ | OH | TGSH | LV | SV | HS | SE | EV | DF | VV |
| Echicetin      | MGRF | IFVSFGLLVVFL | SLSGTEAGFC | CP | LGWSSYDEH | CYQV | FQQKMN | WEDA | KFC | TQ | OH | TGSH | LV | SV | HS | SE | EV | DF | VV |
| Convulxin      | MGRF | IFVSFGLLVVFL | SLSGTEAGFC | CP | LGWSSYDEH | CYQV | FQQKMN | WEDA | KFC | TQ | OH | TGSH | LV | SV | HS | SE | EV | DF | VV |
| Agglucetin     | MGRF | IFVSFGLLVVFL | SLSGTEAGFC | CP | LGWSSYDEH | CYQV | FQQKMN | WEDA | KFC | TQ | OH | TGSH | LV | SV | HS | SE | EV | DF | VV |
| Jerdonuxin     | MGRF | IFVSFGLLVVFL | SLSGTEAGFC | CP | LGWSSYDEH | CYQV | FQQKMN | WEDA | KFC | TQ | OH | TGSH | LV | SV | HS | SE | EV | DF | VV |
| Mamushigin     | MGRF | IFVSFGLLVVFL | SLSGTEAGFC | CP | LGWSSYDEH | CYQV | FQQKMN | WEDA | KFC | TQ | OH | TGSH | LV | SV | HS | SE | EV | DF | VV |
| Rhodocytin     | MGRF | IFVSFGLLVVFL | SLSGTEAGFC | CP | LGWSSYDEH | CYQV | FQQKMN | WEDA | KFC | TQ | OH | TGSH | LV | SV | HS | SE | EV | DF | VV |
| Alboaggregin-B | MGRF | IFVSFGLLVVFL | SLSGTEAGFC | CP | LGWSSYDEH | CYQV | FQQKMN | WEDA | KFC | TQ | OH | TGSH | LV | SV | HS | SE | EV | DF | VV |

  

|                |     |    |     |     |     |     |      |    |   |   |   |   |   |   |   |   |   |   |   |   |
|----------------|-----|----|-----|-----|-----|-----|------|----|---|---|---|---|---|---|---|---|---|---|---|---|
|                | 80  | 90 | 100 | 110 | 120 | 130 | 140  |    |   |   |   |   |   |   |   |   |   |   |   |   |
| Mucetin        | KTL | PI | LK  | AS  | FW  | VW  | IGLS | NV | W | N | A | C | R | L | Q | W | S | D | G | T |
| Stejnulxin     | M   | T  | Y   | P   | I   | L   | K    | L  | D | F | V | W | I | G | L | S | N | V | W | N |
| Echicetin      | L   | V  | S   | E   | N   | I   | Q    | R  | P | E | I | Y | V | W | I | G | L | S | N | V |
| Convulxin      | M   | T  | H   | Q   | S   | L   | K    | S  | T | F | F | W | I | G | A | N | N | I | W | N |
| Agglucetin     | L   | A  | Y   | P   | I   | L   | K    | D  | L | S | L | I | W | M | G | L | S | N | V | W |
| Jerdonuxin     | K   | T  | F   | P   | I   | L   | K    | H  | D | F | V | W | I | G | L | S | N | V | W | N |
| Mamushigin     | M   | T  | W   | P   | I   | L   | K    | Y  | D | F | V | W | I | G | L | S | N | V | W | N |
| Rhodocytin     | L   | T  | R   | P   | L   | K   | A    | N  | L | V | W | M | G | L | S | N | I | W | H | G |
| Alboaggregin-B | K   | T  | L   | P   | I   | L   | K    | A  | D | F | V | W | I | G | L | S | N | V | W | N |

Figure 1. The amino acid sequences of some snake venom C-type lectin-like proteins.

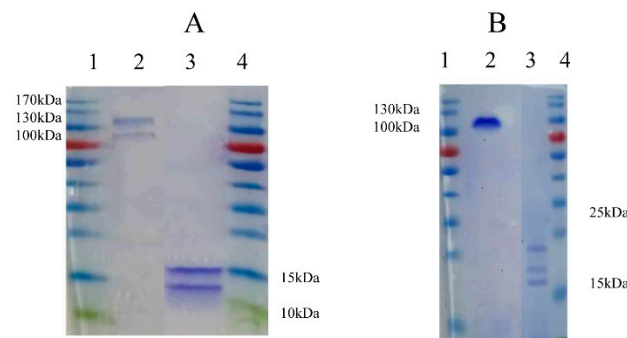

Figure 2. Purity of purified mucetin and stejnulxin as determined by SDS-PAGE and Coomassie blue staining. A. The figure shows the SDS-PAGE pattern of purified mucetin: Lanes 1 is from a 10% gel PAGE under non-reducing conditions; lane 4 is from a 12% gel PAGE under reducing conditions. Lanes 1 and 4 are markers. Lanes 2 and 3, purified stejnulxin. B. The figure shows the SDS-PAGE pattern of purified stejnulxin: Lanes 1 and 2 are from a 10% gel PAGE under non-reducing conditions;

lane 3 and 4 are from a 12% gel PAGE under reducing conditions. Lanes 1 and 4 are markers. Lanes 2 and 3, purified stejnulxin.
